# Supplementary material
Source: Springer Nature journal article supplement (https://www.springermedizin.de/resource/supplementary/12874_2012_966_MOESM2_ESM.pdf/9433258)

**a**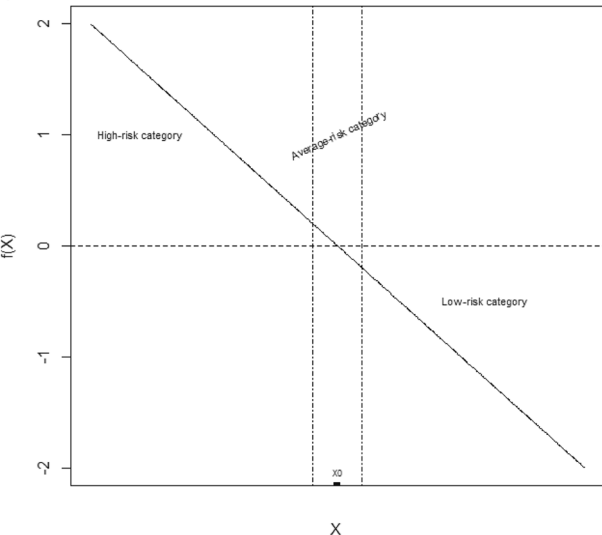**b**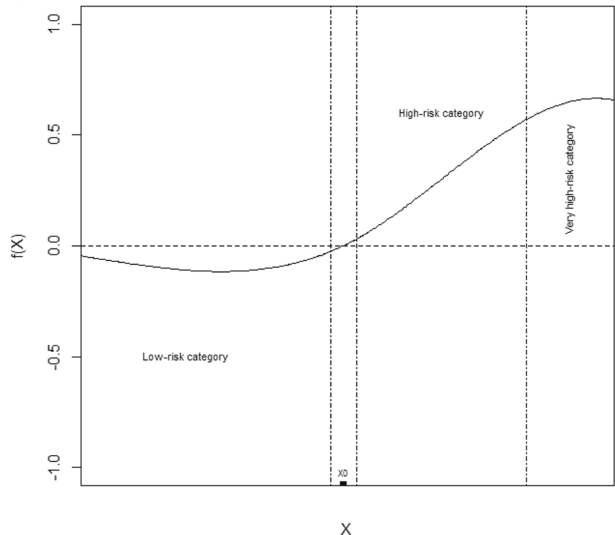

Supplement: MOESM2 [file 9433258]
